# Supplementary material for: A Basal Lithostrotian Titanosaur (Dinosauria: Sauropoda) with a Complete Skull: Implications for the Evolution and Paleobiology of Titanosauria
Source: PubMed Central journal article supplement (PMC4846048; doi:10.1371/journal.pone.0151661), 2016-04-26

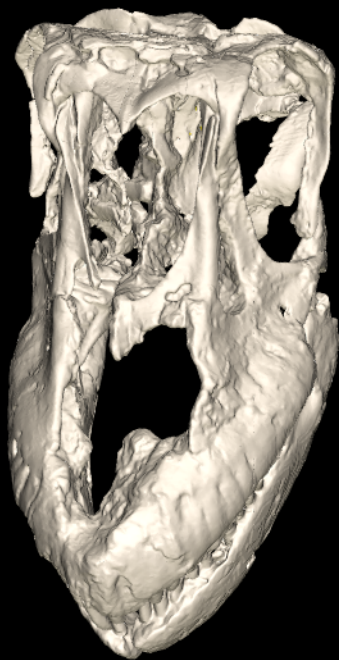

Supplement: pone.0151661.s008.pdf [file pone.0151661.s008.pdf]
